# Supplementary material for: Responses of Nitrogen Removal, Extracellular Polymeric Substances (EPSs), and Physicochemical Properties of Activated Sludge to Different Free Ammonia (FA) Concentrations
Source: MDPI journal article supplement (doi:10.3390/w14040620), 2022-02-17
Supplement: s1 [file s1]

## **Supplementary Material**

### **Responses of nitrogen removal, extracellular polymeric substances (EPS) and physicochemical properties of activated sludge to different free ammonia (FA) concentrations**

Hongwei Sun<sup>a</sup>, Yiran Li<sup>b</sup>, Wei Tang <sup>c</sup>, Huanhuan Chang<sup>b</sup>, Cuizhong Chen<sup>d</sup>, Chenjian Cai <sup>b\*</sup>, and Qian Sun<sup>a\*</sup>

<sup>a</sup> School of Environmental and Material Engineering, Yantai University, Yantai 264005, China

<sup>b</sup> School of Environmental and Municipal Engineering, Lanzhou Jiaotong University, Lanzhou 730070, China

<sup>c</sup> Yantai city drainage service center, Yantai 264005, China

<sup>d</sup> College of Water Conservancy and Architectural Engineering, Shihezi University, Shihezi 832000, China

Correspondence author.

E-mail address: 2528397863@qq.com (C.Cai); 15057860@qq.com (Q.Sun);

**Table S1.** The correlation matrix among microorganism and EPS and its components.

|                   |                | <i>Thauera</i> | <i>Lewinella</i> | <i>Zoogloea</i> | <i>Nitrospira</i> | <i>Azoarcus</i> | <i>Acidovorax</i> | <i>Nitrosomonas</i> | <i>Phaeodactylibacter</i> | <i>Denitratisoma</i> | <i>Sulfuritalea</i> | <i>Dechloromonas</i> | <i>Melioribacter</i> |
|-------------------|----------------|----------------|------------------|-----------------|-------------------|-----------------|-------------------|---------------------|---------------------------|----------------------|---------------------|----------------------|----------------------|
| <i>Thauera</i>    | R <sup>2</sup> | 1              | .738**           | -.936**         | -.929**           | -.883**         | -0.344            | 0.295               | .744**                    | 0.054                | -.912**             | -.853**              | 0.485                |
|                   | <i>p</i>       |                | 0.006            | 0               | 0                 | 0.0000          | 0.274             | 0.352               | 0.006                     | 0.868                | 0                   | 0                    | 0.11                 |
| <i>Lewinella</i>  | R <sup>2</sup> |                | 1                | -.826**         | -.719**           | -.678*          | -.715**           | .627*               | 0.431                     | -0.314               | -.741**             | -.632*               | -0.094               |
|                   | <i>p</i>       |                |                  | 0.001           | 0.008             | 0.015           | 0.009             | 0.029               | 0.161                     | 0.321                | 0.006               | 0.027                | 0.771                |
| <i>Zoogloea</i>   | R <sup>2</sup> |                |                  | 1               | .961**            | .949**          | 0.329             | -.601*              | -0.488                    | 0.247                | .977**              | .925**               | -0.368               |
|                   | <i>p</i>       |                |                  |                 | 0                 | 0               | 0.296             | 0.039               | 0.107                     | 0.439                | 0                   | 0                    | 0.24                 |
| <i>Nitrospira</i> | R <sup>2</sup> |                |                  |                 | 1                 | .977**          | 0.17              | -0.499              | -0.521                    | 0.2                  | .978**              | .961**               | -0.535               |
|                   | <i>p</i>       |                |                  |                 |                   | 0               | 0.597             | 0.099               | 0.083                     | 0.533                | 0                   | 0                    | 0.073                |
| <i>Azoarcus</i>   | R <sup>2</sup> |                |                  |                 |                   | 1               | 0.074             | -0.558              | -0.428                    | 0.282                | .980**              | .995**               | -0.554               |
|                   | <i>p</i>       |                |                  |                 |                   |                 | 0.818             | 0.059               | 0.165                     | 0.374                | 0                   | 0                    | 0.062                |
| <i>Acidovorax</i> | R <sup>2</sup> |                |                  |                 |                   |                 | 1                 | -0.22               | -0.355                    | 0.063                | 0.172               | 0.014                | 0.549                |
|                   | <i>p</i>       |                |                  |                 |                   |                 |                   | 0.492               | 0.257                     | 0.845                | 0.592               | 0.966                | 0.064                |

|                           |                |   |        |         |        |        |        |
|---------------------------|----------------|---|--------|---------|--------|--------|--------|
| <i>Nitrosomonas</i>       | R <sup>2</sup> | 1 | -0.341 | -.849** | -.600* | -0.553 | -0.191 |
|                           | <i>p</i>       |   | 0.278  | 0       | 0.039  | 0.062  | 0.551  |
| <i>Phaeodactylibacter</i> | R <sup>2</sup> |   | 1      | .629*   | -0.44  | -0.39  | 0.464  |
|                           | <i>p</i>       |   |        | 0.029   | 0.152  | 0.21   | 0.128  |
| <i>Denitratisoma</i>      | R <sup>2</sup> |   |        | 1       | 0.299  | 0.291  | 0.337  |
|                           | <i>p</i>       |   |        |         | 0.345  | 0.359  | 0.285  |
| <i>Sulfuritalea</i>       | R <sup>2</sup> |   |        |         | 1      | .962** | -0.48  |
|                           | <i>p</i>       |   |        |         |        | 0      | 0.114  |
| <i>Dechloromonas</i>      | R <sup>2</sup> |   |        |         |        | 1      | -0.563 |
|                           | <i>p</i>       |   |        |         |        |        | 0.057  |
| <i>Melioribacter</i>      | R <sup>2</sup> |   |        |         |        |        | 1      |
|                           | <i>p</i>       |   |        |         |        |        |        |
| <i>Delftia</i>            | R <sup>2</sup> |   |        |         |        |        |        |
|                           | <i>p</i>       |   |        |         |        |        |        |
| <i>Variovorax</i>         | R <sup>2</sup> |   |        |         |        |        |        |
|                           | <i>p</i>       |   |        |         |        |        |        |

---

|                     |       |
|---------------------|-------|
| <i>Halomonas</i>    | $R^2$ |
|                     | $p$   |
| <i>Planctomyces</i> | $R^2$ |
|                     | $p$   |
| <i>Pseudomonas</i>  | $R^2$ |
|                     | $p$   |

---

(Continued Table)

|                   |                | <i>Delftia</i> | <i>Variovorax</i> | <i>Halomonas</i> | <i>Planctomycetes</i> | <i>Pseudomonas</i> | <i>LB-EPS</i> | <i>TB-EPS</i> | <i>PN</i> | <i>PS</i> | <i>EPS</i> | <i>CST</i> | <i>SVI</i> | <i>SRF</i> |
|-------------------|----------------|----------------|-------------------|------------------|-----------------------|--------------------|---------------|---------------|-----------|-----------|------------|------------|------------|------------|
| <i>Thauera</i>    | R <sup>2</sup> | 0.308          | -0.14             | .823**           | -.845**               | .833**             | 0.355         | 0.162         | .752**    | -0.097    | 0.24       | -.715**    | -.855**    | -.643*     |
|                   | <i>p</i>       | 0.331          | 0.664             | 0.001            | 0.001                 | 0.001              | 0.258         | 0.614         | 0.005     | 0.764     | 0.453      | 0.009      | 0          | 0.024      |
| <i>Lewinella</i>  | R <sup>2</sup> | 0.162          | -0.507            | 0.534            | -.579*                | 0.554              | .729**        | 0.419         | .814**    | 0.301     | 0.548      | -.925**    | -.776**    | -.844**    |
|                   | <i>p</i>       | 0.614          | 0.093             | 0.074            | 0.049                 | 0.062              | 0.007         | 0.176         | 0.001     | 0.343     | 0.065      | 0          | 0.003      | 0.001      |
| <i>Zoogloea</i>   | R <sup>2</sup> | -0.125         | 0.064             | -.621*           | .910**                | -.639*             | -.636*        | -0.485        | -.926**   | -0.248    | -0.555     | .719**     | .716**     | .589*      |
|                   | <i>p</i>       | 0.698          | 0.843             | 0.031            | 0                     | 0.025              | 0.026         | 0.11          | 0         | 0.436     | 0.061      | 0.008      | 0.009      | 0.044      |
| <i>Nitrospira</i> | R <sup>2</sup> | -0.259         | -0.069            | -.584*           | .948**                | -.606*             | -0.518        | -0.43         | -.873**   | -0.165    | -0.474     | .591*      | .660*      | 0.462      |

|                           |                |            |        |        |        |            |        |        |         |        |        |        |         |        |
|---------------------------|----------------|------------|--------|--------|--------|------------|--------|--------|---------|--------|--------|--------|---------|--------|
| <i>Azoarcus</i>           | <i>p</i>       | 0.4<br>17  | 0.83   | 0.046  | 0      | 0.03<br>7  | 0.085  | 0.163  | 0       | 0.608  | 0.12   | 0.043  | 0.019   | 0.131  |
|                           | R <sup>2</sup> | -0.2       | -0.181 | -0.477 | .973** | -0.50<br>5 | -0.554 | -0.515 | -.894** | -0.25  | -0.542 | 0.517  | 0.567   | 0.368  |
|                           | <i>p</i>       | 0.4<br>82  | 0.574  | 0.117  | 0      | 0.09<br>4  | 0.062  | 0.087  | 0       | 0.433  | 0.068  | 0.085  | 0.055   | 0.239  |
|                           | R <sup>2</sup> | -0.1<br>36 | .948** | -0.53  | -0.057 | -0.55<br>3 | -0.395 | 0.04   | -0.287  | -0.006 | -0.125 | .872** | .702*   | .920** |
| <i>Nitrosomonas</i>       | <i>p</i>       | 0.6<br>74  | 0      | 0.076  | 0.861  | 0.06<br>2  | 0.204  | 0.902  | 0.366   | 0.985  | 0.698  | 0      | 0.011   | 0      |
|                           | R <sup>2</sup> | -0.2<br>27 | 0.053  | -0.15  | -0.548 | -0.11<br>2 | .970** | .949** | .839**  | .902** | .981** | -0.427 | -0.08   | -0.244 |
|                           | <i>p</i>       | 0.4<br>78  | 0.869  | 0.642  | 0.065  | 0.72<br>9  | 0      | 0      | 0.001   | 0      | 0      | 0.166  | 0.805   | 0.445  |
| <i>Phaeodactylibacter</i> | R <sup>2</sup> | 0.4<br>8   | -0.348 | .890** | -0.37  | .863<br>** | -0.258 | -0.505 | 0.161   | -.695* | -0.424 | -0.527 | -.851** | -.597* |
|                           | <i>p</i>       | 0.1        | 0.268  | 0      | 0.236  | 0          | 0.418  | 0.094  | 0.618   | 0.012  | 0.17   | 0.078  | 0       | 0.04   |

|                      |                |        |        |        |        |        |         |         |         |         |         |       |        |        |
|----------------------|----------------|--------|--------|--------|--------|--------|---------|---------|---------|---------|---------|-------|--------|--------|
| <i>Denitratisoma</i> | R <sup>2</sup> | 0.039  | -0.125 | 0.476  | 0.28   | 0.403  | -.840** | -.900** | -.588*  | -.934** | -.900** | 0.159 | -0.225 | -0.004 |
|                      | <i>p</i>       | 0.903  | 0.698  | 0.118  | 0.378  | 0.194  | 0.001   | 0       | 0.044   | 0       | 0       | 0.621 | 0.482  | 0.991  |
| <i>Sulfuritalea</i>  | R <sup>2</sup> | -0.217 | -0.099 | -0.525 | .972** | -0.547 | -.610*  | -0.53   | -.930** | -0.274  | -0.574  | .602* | .624*  | 0.455  |
|                      | <i>p</i>       | 0.497  | 0.759  | 0.08   | 0      | 0.066  | 0.035   | 0.076   | 0       | 0.389   | 0.051   | 0.038 | 0.03   | 0.137  |
| <i>Dechloromonas</i> | R <sup>2</sup> | -0.202 | -0.239 | -0.437 | .965** | -0.469 | -0.538  | -0.523  | -.876** | -0.261  | -0.542  | 0.467 | 0.518  | 0.315  |
|                      | <i>p</i>       | 0.529  | 0.455  | 0.156  | 0      | 0.124  | 0.071   | 0.081   | 0       | 0.413   | 0.069   | 0.126 | 0.084  | 0.319  |
| <i>Melioribacter</i> | R <sup>2</sup> | 0.242  | .599*  | 0.289  | -.630* | 0.254  | -0.289  | -0.08   | 0.182   | -0.331  | -0.162  | 0.236 | -0.123 | 0.29   |
|                      | <i>p</i>       | 0.448  | 0.04   | 0.363  | 0.028  | 0.427  | 0.363   | 0.804   | 0.571   | 0.293   | 0.615   | 0.46  | 0.704  | 0.361  |
| <i>Delftia</i>       | R <sup>2</sup> | 1      | 0.158  | 0.259  | 0.195  | 0.309  | 0.146   | 0.259   | 0.075   | 0.360   | 0.223   | 0.244 | 0.418  | 0.278  |

|                     |                |       |        |        |        |        |        |         |        |        |         |         |         |
|---------------------|----------------|-------|--------|--------|--------|--------|--------|---------|--------|--------|---------|---------|---------|
|                     | <i>p</i>       | 0.624 | 0.416  | 0.544  | 0.329  | 0.65   | 0.416  | 0.816   | 0.251  | 0.487  | 0.444   | 0.176   | 0.381   |
| <i>Variovorax</i>   | R <sup>2</sup> | 1     | -0.467 | -0.318 | -0.479 | -0.131 | 0.293  | 0.011   | 0.195  | 0.138  | .709**  | .592*   | .813**  |
|                     | <i>p</i>       |       | 0.126  | 0.313  | 0.115  | 0.685  | 0.356  | 0.974   | 0.545  | 0.669  | 0.01    | 0.043   | 0.001   |
| <i>Halomonas</i>    | R <sup>2</sup> |       | 1      | -0.414 | .992** | -0.039 | -0.341 | 0.315   | -0.517 | -0.234 | -.691*  | -.915** | -.737** |
|                     | <i>p</i>       |       |        | 0.181  | 0      | 0.905  | 0.278  | 0.319   | 0.085  | 0.463  | 0.013   | 0       | 0.006   |
| <i>Planctomyces</i> | R <sup>2</sup> |       |        | 1      | -0.429 | -0.516 | -0.539 | -.870** | -0.266 | -0.543 | 0.401   | 0.469   | 0.242   |
|                     | <i>p</i>       |       |        |        | 0.164  | 0.086  | 0.071  | 0       | 0.403  | 0.068  | 0.196   | 0.124   | 0.449   |
| <i>Pseudomonas</i>  | R <sup>2</sup> |       |        |        | 1      | 0.01   | -0.301 | 0.352   | -0.476 | -0.19  | -.723** | -.927** | -.762** |
|                     | <i>p</i>       |       |        |        |        | 0.976  | 0.342  | 0.261   | 0.118  | 0.554  | 0.008   | 0       | 0.004   |



|               |                |   |        |        |        |        |        |        |        |
|---------------|----------------|---|--------|--------|--------|--------|--------|--------|--------|
| <i>LB-EPS</i> | R <sup>2</sup> | 1 | .896** | .858** | .858** | .958** | -.577* | -0.215 | -0.411 |
|               | <i>p</i>       |   | 0      | 0      | 0      | 0      | 0.05   | 0.502  | 0.185  |
| <i>TB-EPS</i> | R <sup>2</sup> |   |        | .762** | .955** | .986** | -0.176 | 0.154  | 0.026  |
|               | <i>p</i>       |   |        | 0.004  | 0      | 0      | 0.584  | 0.633  | 0.937  |
| <i>PN</i>     | R <sup>2</sup> |   |        | 1      | .578*  | .818** | -.651* | -0.498 | -0.477 |
|               | <i>p</i>       |   |        |        | 0.049  | 0.001  | 0.022  | 0.1    | 0.117  |
| <i>PS</i>     | R <sup>2</sup> |   |        |        | 1      | .942** | -0.091 | 0.316  | 0.083  |
|               | <i>p</i>       |   |        |        |        | 0      | 0.779  | 0.317  | 0.798  |
| <i>EPS</i>    | R <sup>2</sup> |   |        |        |        | 1      | -0.333 | 0.017  | -0.14  |
|               | <i>p</i>       |   |        |        |        |        | 0.29   | 0.958  | 0.664  |
| <i>CST</i>    | R <sup>2</sup> |   |        |        |        |        | 1      | .888** | .977** |
|               | <i>p</i>       |   |        |        |        |        |        | 0      | 0      |
| <i>SVI</i>    | R <sup>2</sup> |   |        |        |        |        |        | 1      | .907** |
|               | <i>p</i>       |   |        |        |        |        |        |        | 0      |

---

SRF

$R^2$

1

$p$

---

\*. Correlation is significant at the 0.05 level.

\*\*. Correlation is significant at the 0.01 level.
